# Supplementary material
Source: PubMed Central journal article supplement (PMC5600492)
Supplement: NIHMS901763-supplement-supplement_1.pdf [file NIHMS901763-supplement-supplement_1.pdf]

**Supplemental Table 1 List of CDS Alerts for Specific Drugs, Associated Gene(s), and Date of Implementation**

| <b>Drug</b>      | <b>Gene</b>   | <b>EHR Implementation</b> |
|------------------|---------------|---------------------------|
| Abacavir         | HLA-B*57:01   | 1/26/2013                 |
| Carbamazepine    | HLA-B*15:02   | 4/14/2013                 |
| Azathioprine     | TPMT          | 6/20/2013                 |
| 6-Mercaptopurine | TPMT          | 6/20/2013                 |
| Thioguanine      | TPMT          | 6/20/2013                 |
| Codeine          | CYP2D6        | 10/26/2013                |
| Tramadol         | CYP2D6        | 10/26/2013                |
| Tamoxifen        | CYP2D6        | 12/19/2013                |
| Simvastatin      | SLCO1B1       | 4/24/2014                 |
| Clopidogrel      | CYP2C19       | 9/18/2014                 |
| Warfarin         | CYP2C9/VKORC1 | 9/18/2014                 |
| Allopurinol      | HLA-B*58:01   | 11/20/2014                |
